# Supplementary material for: Effect of Heading Date on the Starch Structure and Grain Yield of Rice Lines with Low Gelatinization Temperature
Source: MDPI journal article supplement (doi:10.3390/ijms231810783), 2022-09-15
Supplement: s1 [file s1]

**Supplementary Table S1:** List of Primers Used for Sequencing.

| #   | Direction | Oligonucleotide sequence          |
|-----|-----------|-----------------------------------|
| 1   | Forward   | 5' GCAAAGATGAACAGAGGTGG 3'        |
| 2   | Forward   | 5' GAGGCATATTTAACGTTATAGCAGGGC 3' |
| 3   | Forward   | 5' GGCTTAGTTCCATCTAAGAGATG 3'     |
| 4   | Forward   | 5' CAAGAGCCATGCGAGGTAGAG 3'       |
| *5  | Forward   | 5' GGCATGTATTTTGGTGAAGTCG 3'      |
| 6   | Forward   | 5' CAAGCTGCGATCTTTAGGCTG 3'       |
| 7   | Forward   | 5' GCCAAGAGATCAGATGTGCAG 3'       |
| 8   | Forward   | 5' GTGTCCACTGGCCAGATAGTATC 3'     |
| 9   | Forward   | 5' GCACCAACCGCATATACAGG 3'        |
| 10  | Reverse   | 5' GGATTCTGATGCTTGATTAATTCC 3'    |
| 11  | Reverse   | 5' CTGGTCTGCCTAAAGATCAATTG 3'     |
| *12 | Reverse   | 5' GTTGTCGTAGTACGAATTGTACCCGAC 3' |
| 13  | Reverse   | 5' GCTTGCACCACATGGACAAGTCTATCG 3' |

\* Primers used for genotype screening of *hd1*.

**Supplementary Table S2.** Agricultural Traits of Rice NILs Grown in 2020.

| Yield and yield components               | <i>ss2a Hd1</i> | <i>ss2a Hd1 hd1</i> | <i>ss2a hd1</i> |
|------------------------------------------|-----------------|---------------------|-----------------|
| Days to heading (days)                   | 112             | 94                  | 72              |
| Days to maturation (days)                | 48              | 44                  | 40              |
| Plant height (cm)                        | 110 ± 0.4a      | 102 ± 0.2b          | 98 ± 0.6c       |
| Culm length (cm)                         | 88 ± 0.7a       | 81 ± 0.2b           | 77 ± 0.5c       |
| Ear length (cm)                          | 22 ± 0.4a       | 21 ± 0.1a           | 21 ± 0.2a       |
| Ear number (No.)                         | 21 ± 1.4a       | 22 ± 0.3a           | 21 ± 1.6a       |
| Whole plant dry weight (g)               | 128.5 ± 11.5a   | 107.4 ± 1.8ab       | 83.9 ± 6.1b     |
| Dry straw weight (g)                     | 72.8 ± 6.5a     | 53.6 ± 1.0ab        | 37.6 ± 2.2b     |
| Total grain weight (g)                   | 53.9 ± 4.9a     | 48.5 ± 0.8a         | 43.7 ± 3.8a     |
| Number of grains per 10 g (No.)          | 365.3 ± 4.4b    | 354.7 ± 0.6b        | 417.9 ± 7.0a    |
| Thousand grain weight (g)                | 27.4 ± 0.3a     | 28.2 ± 0.1a         | 24.0 ± 0.4b     |
| Percentages of fertile seeds (%)         | 82.2 ± 1.6      | 91.0 ± 0.2          | 87.7 ± 2.1      |
| Thousand dehulled-grain weight (g)       | 28.9 ± 0.2a     | 27.0 ± 0.0b         | 26.4 ± 0.3b     |
| Percentages of green immature grains (%) | 4.6 ± 1.0a      | 4.0 ± 0.8a          | 0.1 ± 0.0b      |

Average values are presented as mean ± standard error. n = 9, 20, and 8 for *ss2a Hd1*, *ss2a Hd1 hd1*, and *ss2a hd1*, respectively. Different letters (a-c) indicate significantly different from one another as determined by Tukey-Kramer method ( $p < 0.05$ ).

**Supplementary Table S3.** Agricultural Traits of Rice NILs Grown in 2021.

| <b>Yield and yield components</b>        | <i>ss2a Hd1</i> | <i>ss2a Hd1 hd1</i> | <i>ss2a hd1</i> |
|------------------------------------------|-----------------|---------------------|-----------------|
| Days to heading (days)                   | 104             | 92                  | 78              |
| Days to maturation (days)                | 54              | 47                  | 40              |
| Plant height (cm)                        | 117.2 ± 0.5a    | 112.5 ± 0.6b        | 106.2 ± 0.6c    |
| Culm length (cm)                         | 95.3 ± 0.5a     | 90.2 ± 0.9b         | 84.0 ± 0.7c     |
| Ear length (cm)                          | 21.9 ± 0.3a     | 22.3 ± 0.4a         | 22.2 ± 0.4a     |
| Ear number (No.)                         | 20.1 ± 0.6a     | 21.6 ± 1.3a         | 21.6 ± 1.1a     |
| Whole plant dry weight (g)               | 106.0 ± 6.2a    | 99.0 ± 6.6a         | 77.1 ± 4.9b     |
| Dry straw weight (g)                     | 65.9 ± 3.9a     | 46.7 ± 3.2b         | 34.4 ± 1.7c     |
| Total grain weight (g)                   | 34.1 ± 2.3b     | 47.5 ± 3.2a         | 37.7 ± 3.2b     |
| Number of grains per 10 g (No.)          | 427.1 ± 8.9a    | 347.6 ± 2.4c        | 362.9 ± 5.5b    |
| Thousand grain weight (g)                | 23.6 ± 0.5b     | 28.8 ± 0.2a         | 27.7 ± 0.4a     |
| Percentages of fertile seeds (%)         | 78.7 ± 2.0b     | 89.8 ± 0.7a         | 82.7 ± 1.2b     |
| Thousand dehulled-grain weight (g)       | 29.8 ± 0.2c     | 32.1 ± 0.2b         | 33.4 ± 0.3a     |
| Percentages of green immature grains (%) | 43.2 ± 2.5a     | 12.2 ± 1.1b         | 4.4 ± 0.7c      |

Average values are presented as mean ± standard error (n=20). Different letters (a-c) indicate significantly different from one another as determined by Tukey-Kramer method ( $p < 0.05$ ).

**Supplementary Table S4.** Average of daily temperature during the seed development.

| Line                | Maximum |      | Minimum |      | Day average |      |
|---------------------|---------|------|---------|------|-------------|------|
|                     | 2020    | 2021 | 2020    | 2021 | 2020        | 2021 |
| <i>ss2a Hd1</i>     | 21.4    | 21.7 | 13.4    | 13.1 | 17.0        | 17.0 |
| <i>ss2a Hd1 hd1</i> | 27.5    | 25.5 | 19.4    | 16.7 | 22.8        | 20.8 |
| <i>ss2a hd1</i>     | 30.8    | 28.5 | 23.1    | 20.9 | 26.6        | 24.5 |

Meteoroidal dataset of the rice field was obtained from the Japan Meteorological Agency. Average temperature of daily high, low, and average were calculated for 2020 and 2021.

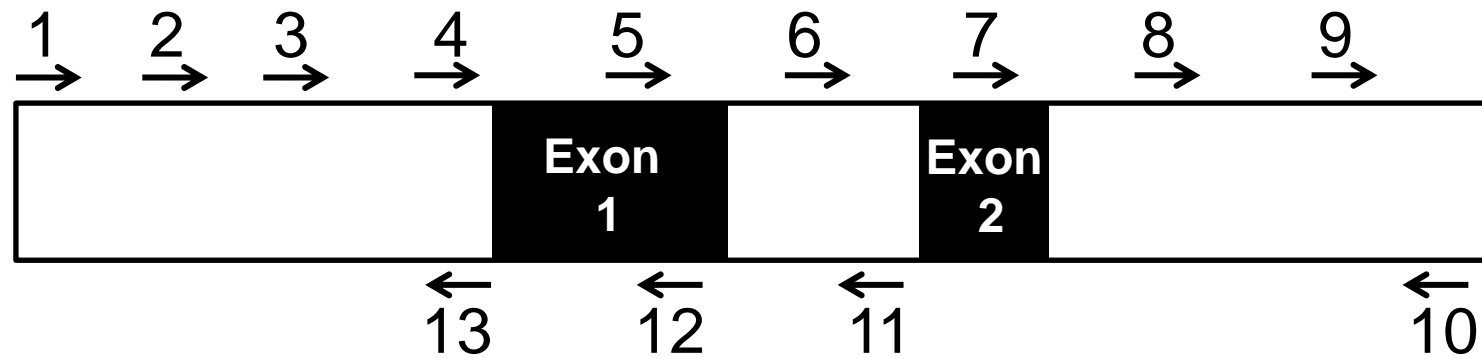

**Supplementary Figure S1.** Locations of primers used for sequencing the *Hd1* gene of rice accessions

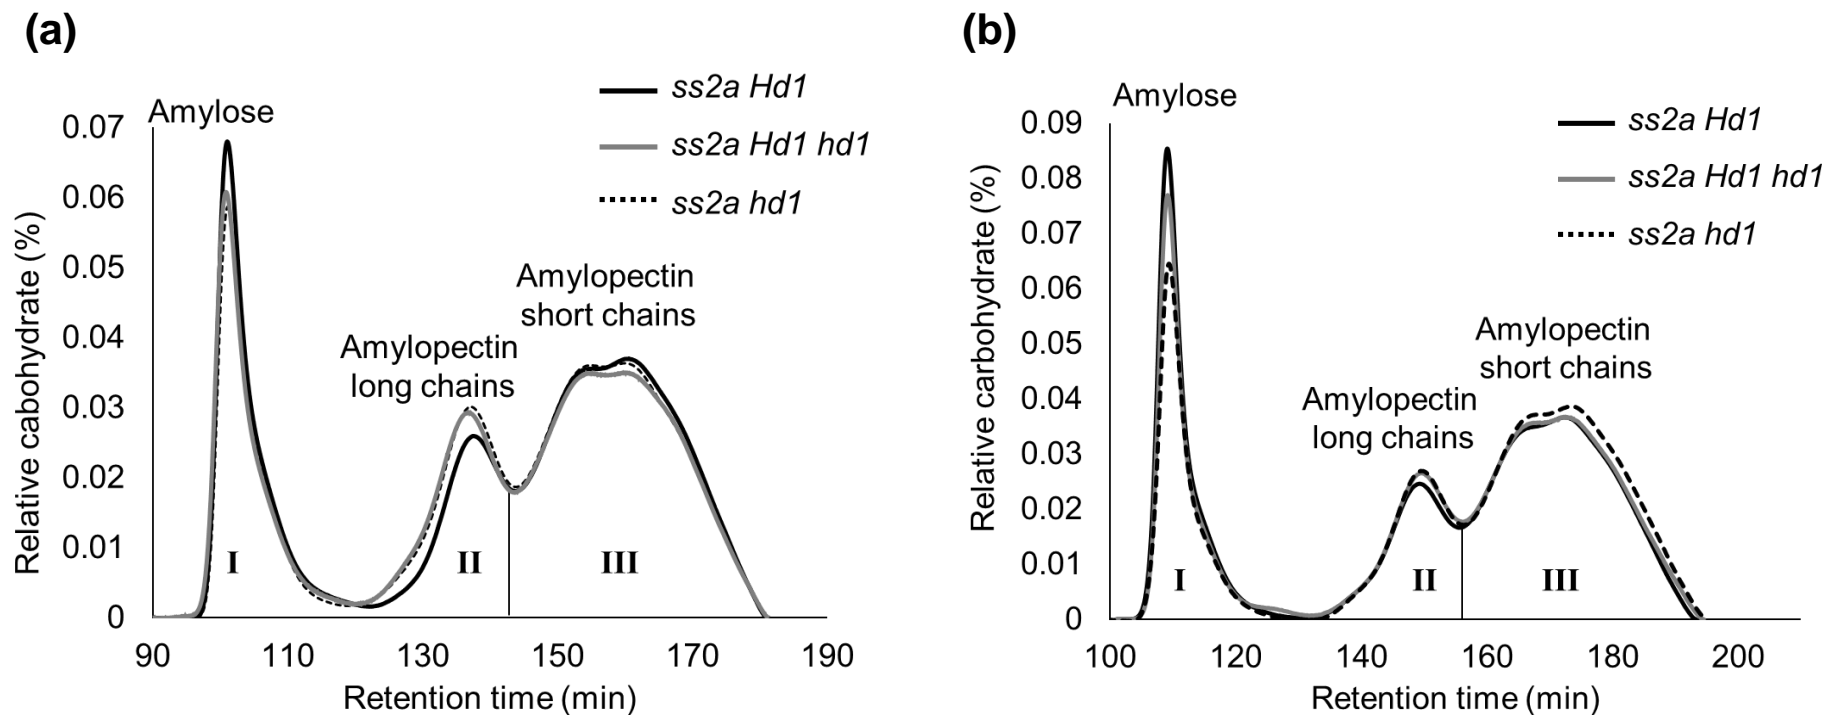

**Supplementary Figure S2.** Elution profiles of rice accessions by gel filtration chromatography of debranched starch prepared from rice seeds harvested in **(a)** 2020 and **(b)** 2021. Three fractions (I, II, and III) were divided at the troughs of carbohydrate-content curve. Amylose elutes in fraction I, long chains of amylopectin branches elute in fraction II, and short chains of amylopectin branches elute in fraction III. Elution profiles are one of the representatives of at least three experiments. Exact values are shown in Table 4 and supplementary table 4.

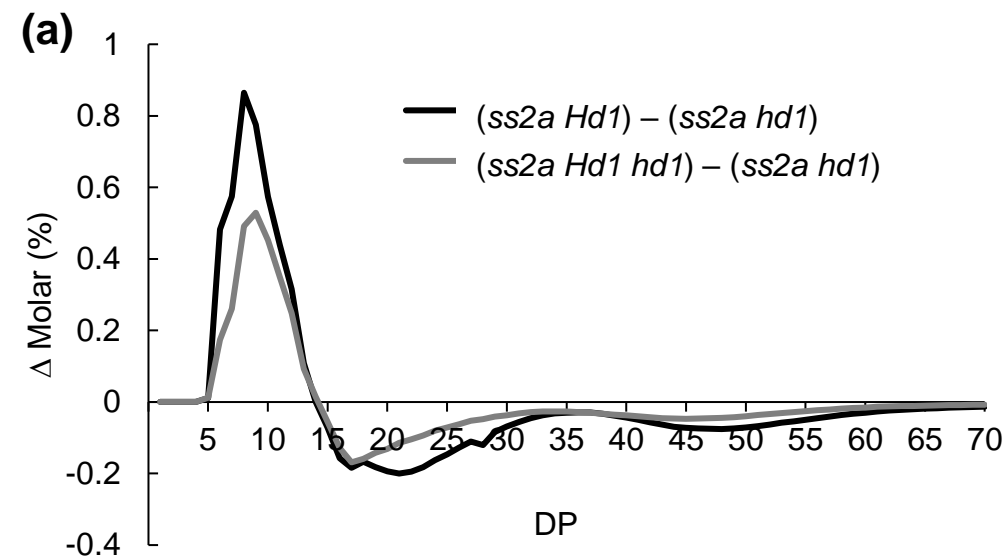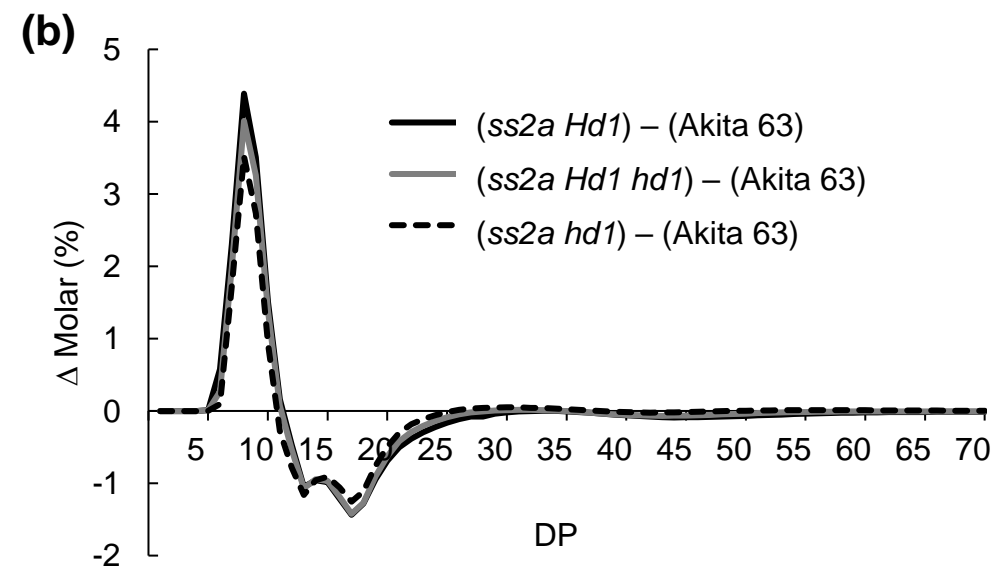

**Supplementary Figure S3.** Differences in amylopectin branch structure among rice NILs. Samples were prepared using rice seeds harvested in 2020. **(a)** The effects of the *Hd1* genotypes on amylopectin branch structure shown by subtraction curves as indicated. **(b)** The effect of loss of SSIIa on amylopectin structure shown by subtraction curves as indicated. Each panel shows one typical representative data set of at least three replications.

|     |             |                                                                 |     |
|-----|-------------|-----------------------------------------------------------------|-----|
| (a) | Akita63     | MNYNFGGNVFDQEVGVGGE GGGGGEGSGCPWARPCDGCRAAPSVVYCRADAAYLCASDA    | 60  |
|     | HS66        | MNYNFGGNVFDQEVGVGGE GGGGGEGSGCPWARPCDGCRAAPSVVYCRADAAYLCASDA    | 60  |
|     | Sasanishiki | MNYNFGGNVFDQEVGVGGE GGGGGEGSGCPWARPCDGCRAAPSVVYCRADAAYLCASDA    | 60  |
|     |             | *****                                                           |     |
|     |             |                                                                 |     |
|     | Akita63     | RVHAANRVASRHERVRVCEACERAPAALACRADAAALCVACDVQVYSANPLARRHQRPV     | 120 |
|     | HS66        | RVHAANRVASRHERVRVCEACERAPAALACRADAAALCVACDVQVYSANPLARRHQRPV     | 120 |
|     | Sasanishiki | RVHAANRVASRHERVRVCEACERAPAALACRADAAALCVACDVQVYSANPLARRHQRPV     | 120 |
|     |             | *****                                                           |     |
|     |             |                                                                 |     |
|     | Akita63     | APLPAITIPATSVLAEAVVATATVLGDKDEEVDSWLLLSKSDNNNNNNNNNDNDNDNDN     | 180 |
|     | HS66        | APLPAITIPATSVLAEAVVATATVLGDKDEEVDSWLLLSKSDNNNNNNNNNDNDNDNDN     | 180 |
|     | Sasanishiki | APLPAITIPATSVLAEAVVATATVLGDKDEEVDSWLLLSKSDNNNNNNNNNDNDNDNDN     | 180 |
|     |             | *****                                                           |     |
|     |             |                                                                 |     |
|     | Akita63     | NSNSSNNGMYFGEVDEYFDLVGYNSYYDNRIENNQDRQYGMHEQQEQEQEQEQEQEMQKEFAE | 240 |
|     | HS66        | NSNSSNNGMYFGEVDEYFDLVGYNSYYDNRIENNQDRQYGMHEQQEQEQEQEQEQEMQKEFAE | 240 |
|     | Sasanishiki | NSNSSNNGMYFGEVDEYFDLVGYNSYYDNRIENNQDRQYGMHEQQEQEQEQEQEQEMQKEFAE | 240 |
|     |             | *****                                                           |     |
|     |             |                                                                 |     |
|     | Akita63     | KEGSECVVMELWEQTRPPP                                             | 259 |
|     | HS66        | KEGSECVVMELWEQTRPPP                                             | 259 |
|     | Sasanishiki | KEGSECVVMELWEQTRPPP                                             | 259 |
|     |             | *****                                                           |     |

**Supplementary Figure S4. (a) Alignment of Hd1 in Akita 63, HS66, and Sasanishiki. Asterisks indicate identical amino acid sequences.**



|                           |                                                                |     |
|---------------------------|----------------------------------------------------------------|-----|
| Akita63                   | MNYNFGGNVFDQEVGVGGE GGGGGEGSGCPWARPCDGCRAAPSVVYCRADAAYLCASCD   | 60  |
| Kasalath                  | MNYNFGGNVFDQEVGVGGE GGGGGEGSGCPWARPCDGCRAAPSVVYCRADAAYLCASCD   | 60  |
| Ginbouzu                  | MNYNFGGNVFDQEVGVGGE GGGGGEGSGCPWARPCDGCRAAPSVVYCRADAAYLCASCD   | 60  |
| Koshihikari               | MNYNFGGNVFDQEVGVGGE GGGGGEGSGCPWARPCDGCRAAPSVVYCRADAAYLCASCD   | 60  |
| *****                     |                                                                |     |
| Akita63                   | RVHAANRVASRHERVRVCEACERAPAAALACRADAAAALCVACDVQVYSANPLARRHQRPV  | 120 |
| Kasalath                  | RVHAANRVASRHERVRVCEACEQAPAAALACRADAAAALCVACDVQVHSANPLARRHQRPV  | 120 |
| Ginbouzu                  | RVHAANRVASRHERVRVCEACERAPAAALACRADAAAALCVACDVQVYSANPLARRHQRPV  | 120 |
| Koshihikari               | RVHAANRVASRHERVRVCEACERAPAAALACRADAAAALCVACDVQVHSAN-----       | 109 |
| *****:*****:***           |                                                                |     |
| Akita63                   | APLPAITIPATSVLAEAVVATATVLGDKDEEVDSWLLLLSKDSDNNNNNNNNNDNDNDNDNN | 180 |
| Kasalath                  | APLPAITIPATSVLAEAVVATATVLGGKDEEVDSWIIILSKDSDNNNNN-----NN       | 169 |
| Ginbouzu                  | APLPAITIPATSVLAEAVVATATVLGDKDEEVDSWLLLLSKDSDNNNNNNNNNDNDNDNDNN | 180 |
| Koshihikari               | -PLPAITIPATSVLAEAVVATATVLGDKDEEVDSWLLLLSKDSDNNNNNNNNNDNDNDNDNN | 168 |
| *****.*****.:*****:*** ** |                                                                |     |
| Akita63                   | NSNSSNNGMYFGEVDEYFDLVGYNSYYDNRIENNQDRQYGMHEQQEQQQQQEQMKEFAE    | 240 |
| Kasalath                  | NSNSSNNGMYFGEVDEYFDLVGYNSYYDNRIENNQDQQYGMHEQQEQQQQQEQMKEFAE    | 229 |
| Ginbouzu                  | NSNSSNNGMYFGEVDEYFDLVGYNSYYDNRIENNQDRQYGMHEQQEQQQQQEQMKEFAE    | 240 |
| Koshihikari               | NSNSSNNGMYFGEVDEYFDLVGYNSYYDNRIENNQDRQYGMHEQQEQQQQQEQMKEFAE    | 228 |
| *****:*****               |                                                                |     |
| Akita63                   | KEGSECVVMELWEQTRPPP-----                                       | 259 |
| Kasalath                  | KEGSECVVPSQITMLSEQQHSYG VVGADQAASMTAGVSAYTDSISNSISLINGGGYSTR   | 289 |
| Ginbouzu                  | KEGSECVVPSQITMLSEQQHSYG VVGADQAASMTAGVSAYTDSISNSISFSSMEAGIVP   | 300 |
| Koshihikari               | KEGSECVVPSQITMLSEQQHSYG VVGADQAASMTAGVSAYTDSISNSISFSSMEAGIVP   | 288 |
| ***** .                   |                                                                |     |
| Akita63                   | -----                                                          | 259 |
| Kasalath                  | QHG--D-RYAKFQHPD---TCWSNQSLRLSLA-----SDVPSLQLHGQGG-----        | 328 |
| Ginbouzu                  | DSTVIDMPNSRILTPAGAINLFSGPSLQMSLHFSSMDREARVLRREKKKARKFEKTIRY    | 360 |
| Koshihikari               | DSTVIDMPNSRILTPAGAINLFSGPSLQMSLHFSSMDREARVLRREKKKARKFEKTIRY    | 348 |
|                           |                                                                |     |
| Akita63                   | -----                                                          | 259 |
| Kasalath                  | -----QGAQVQGEEEE-----GQEV-----                                 | 342 |
| Ginbouzu                  | ETRKAYAEARPRIKGRFAKRSDVQIEVDQMFSTAALSDGSYGTVPWF                | 407 |
| Koshihikari               | ETRKAYAEARPRIKGRFAKRSDVQIEVDQMFSTAALSDGSYGTVPWF                | 395 |

**Supplementary Figure S4. (b)** Alignment of Hd1 in Akita 63, Kasalath, Ginbouzu, and Koshihikari. Asterisks, dashes, periods, and colons indicate identical amino acid sequences, missing residues, semi-conservative substitutions, conservative substitutions, respectively.

|             |                                                                |     |
|-------------|----------------------------------------------------------------|-----|
| Ginbouzu    | MNYNFGGNVFDQEVGVGEGGGGGEGSGCPWARPCDGCRAAPSVVYCRADAAYLCASDA     | 60  |
| Hoshinoyume | MNYNFGGNVFDQEVGVGEGGGGGEGSGCPWARPCDGCRAAPSVVYCRADAAYLCASDA     | 60  |
| Hayamasari  | MNYNFGGNVFDQEVGVGEGGGGGEGSGCPWARPCDGCRAAPSVVYCRADAAYLCASDA     | 60  |
|             | *****                                                          |     |
| Ginbouzu    | RVHAANRVASRHERVRVCEACERAPAALACRADAAALCVACDVQVYSANPLARRHQRPV    | 120 |
| Hoshinoyume | RVHAANRVASRHERVRVCEACERAPAALACRADAAALCVACDVQVYSANPLARRHQRPV    | 120 |
| Hayamasari  | RVHAANRVASRHERVRVCEACERAPAALACRADAAALCVACDVQVYSANPLARRHQRPV    | 120 |
|             | *****                                                          |     |
| Ginbouzu    | APLPAITIPATSVLAEAVVATATVLGDKDEEVDSWLLLSKSDSDNNNNNNNNNDNDNDNDNN | 180 |
| Hoshinoyume | APLPAITIPATSVLAEAVVATATVLGDKDEEVDSWLLLSKSDSDNNNNNNNNNDNDNDNDNN | 180 |
| Hayamasari  | APLPAITIPATSVLAEAVVATATVLGDKDEEVDSWLLLSKSDSDNNNNNNNNNDNDNDNDNN | 180 |
|             | *****                                                          |     |
| Ginbouzu    | NSNSSNNGMYFGEVDEYFDLVGYNSYYDNRIENNQDRQYGMHEQQEQQQQQEMQKEFAE    | 240 |
| Hoshinoyume | NSNSSNNGMYFGEVDEYFDLVGYNSYYDNRIENNQDRQYGMHEQQEQQQQQEMQKEFAE    | 240 |
| Hayamasari  | NSNSSNNGMYFGEVDEYFDLVGYNSYYDNRIENNQDRQYGMHEQQEQQQQQEMQKEFAE    | 240 |
|             | *****                                                          |     |
| Ginbouzu    | KEGSECVVPSQITMLSEQQHSGYGVGADQAASMTAGVSAYTDSISNSISFSSMEAGIVP    | 300 |
| Hoshinoyume | KEGSECVVPSQITMLSEQQHSGYGVGADQAASMTAGVSAYTDSISNSISFSSMEAGIVP    | 300 |
| Hayamasari  | KEGSECVVPSQITMLSEQQHSGYGVGADQAASMTAGVSAYTDSISNSISFSSMEAGIVP    | 300 |
|             | *****                                                          |     |
| Ginbouzu    | DSTVIDMPNSRILTPAGAINLFSGPSLQMSLHFSSMDREARVRLRYREKKKARKFEKTIRY  | 360 |
| Hoshinoyume | DSTVIDMPNSRILTPAGAINLFSGPSLQMSLHFSSMDREARVRLRYREKKKARKFEKTIRY  | 360 |
| Hayamasari  | DSTVIDMPNSRILTPAGAINLFSGPSLQMSLHFSSMDREARVRLRYREKKKARKFEKTIRY  | 360 |
|             | *****                                                          |     |
| Ginbouzu    | ETRKAYAEARPRIKGRFAKRSDVQIEVDQMFSTAALSDGSYGTVPWF                | 407 |
| Hoshinoyume | ETRKAYAEARPRIKGRFAKRSDVQIEVDQMFSTAALSDGSYGTVPWF                | 407 |
| Hayamasari  | ETRKAYAEARPRIKGRFAKRSDVQIEVDQMFSTAALSDGSYGTVPWF                | 407 |
|             | *****                                                          |     |

**Supplementary Figure S4. (c) Alignment of Hd1 in Ginbouzu, Hoshinoyume, and Hayamasari. Asterisks indicate identical amino acid sequences.**
